# Supplementary material for: MOF-modified dendrite-free gel polymer electrolyte for zinc-ion batteries
Source: Royal Society of Chemistry journal article supplement (doi:10.1039/d4ra02200a), 2024-01-01
Supplement: d4ra02200a1.pdf [file d4ra02200a1.pdf]

## MOF-modified dendrite-free gel polymer electrolyte for zinc ion batteries

Changmiao Huang<sup>a</sup>, Hui Li<sup>a</sup>, Zixuan Teng<sup>a</sup>, Yushu Luo<sup>a</sup> and Wanyu Chen<sup>\* a</sup>

<sup>a</sup> School of Materials Science and Engineering, Wuhan University of Technology, Wuhan 430070, China.

\* Corresponding author

E-mail: chenwanyu@whut.edu.cn

### Supporting Figure

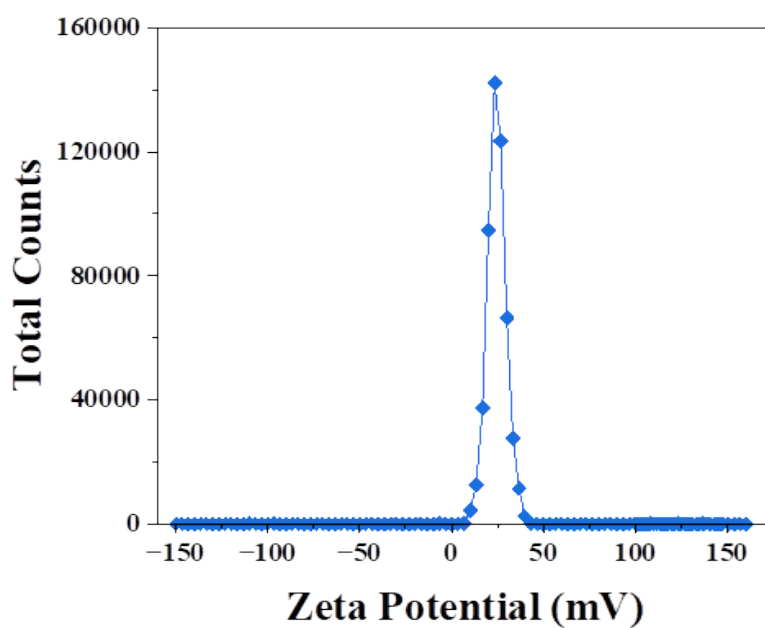

Figure S1 The zeta potential of ZIF-8.

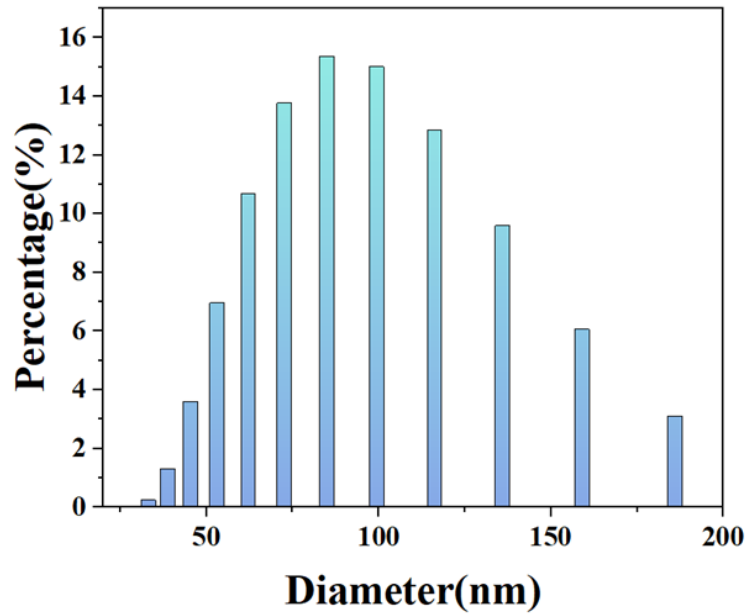

Figure S2 Size distribution of ZIF-8.

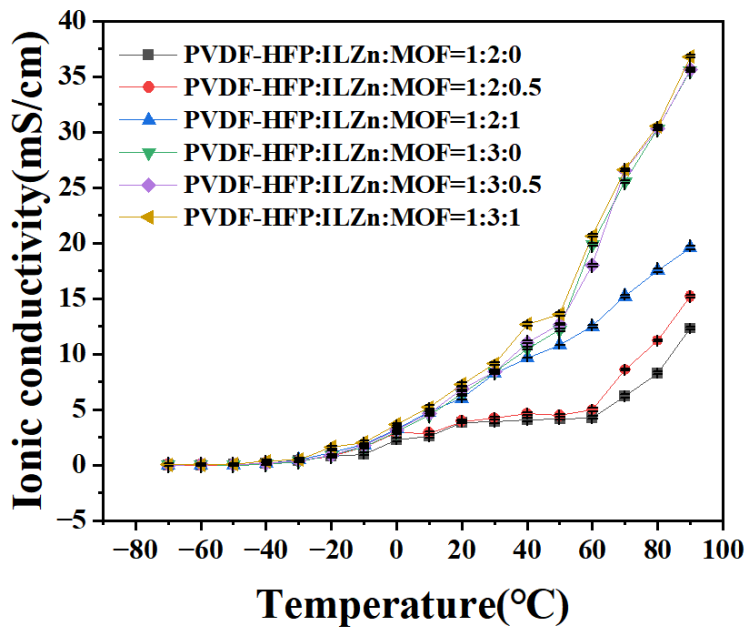

Figure S3 Ionic conductivity of gel polymer electrolyte.

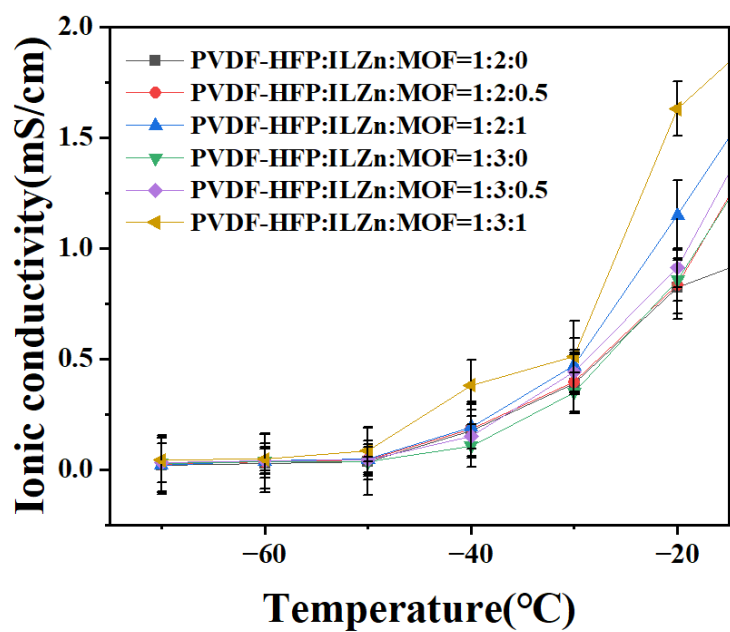

Figure S4 Amplification of ionic conductivity at low temperature

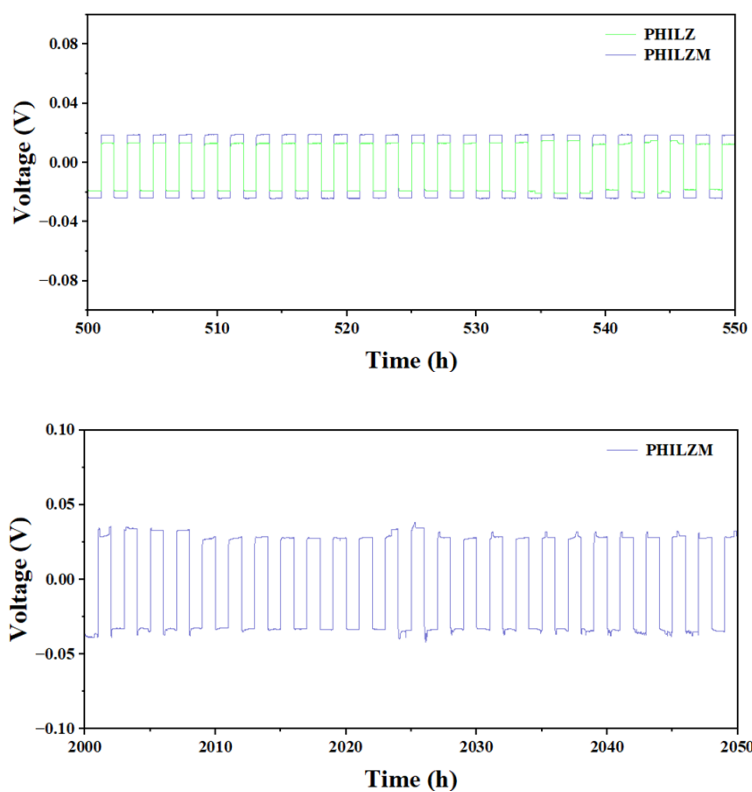

Figure S5 Voltage profiles of Zn/ Zn symmetrical batteries with different electrolyte at the current density of  $1 \text{ mA cm}^{-2}$ .

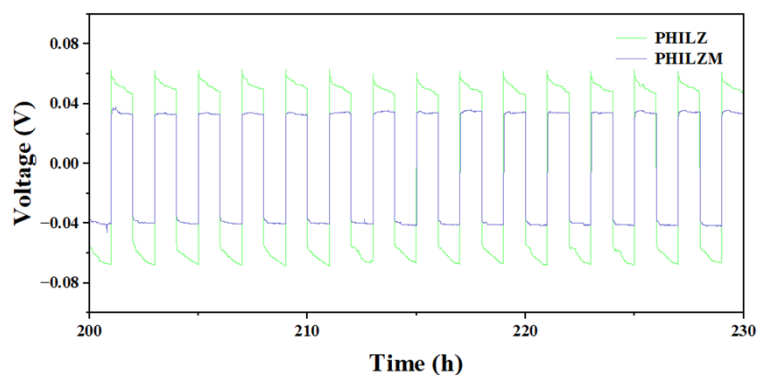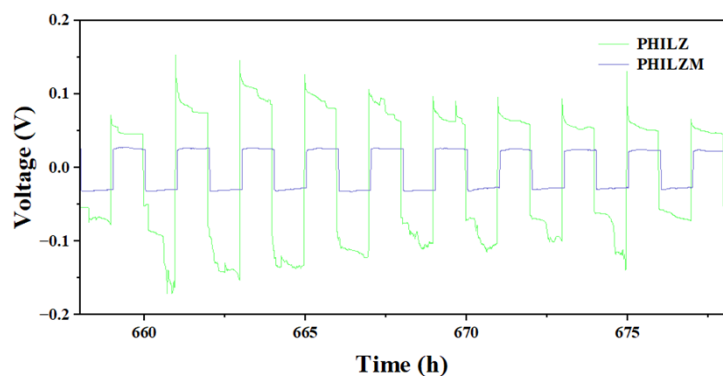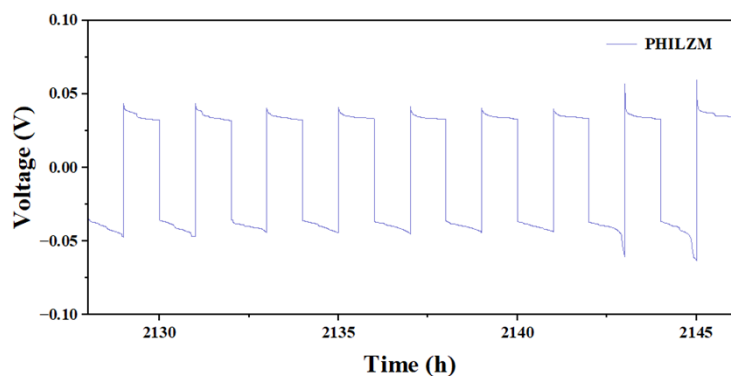

Figure S6 Voltage profiles of Zn/ Zn symmetrical batteries with different electrolyte at the current density of  $5 \text{ mA cm}^{-2}$ .

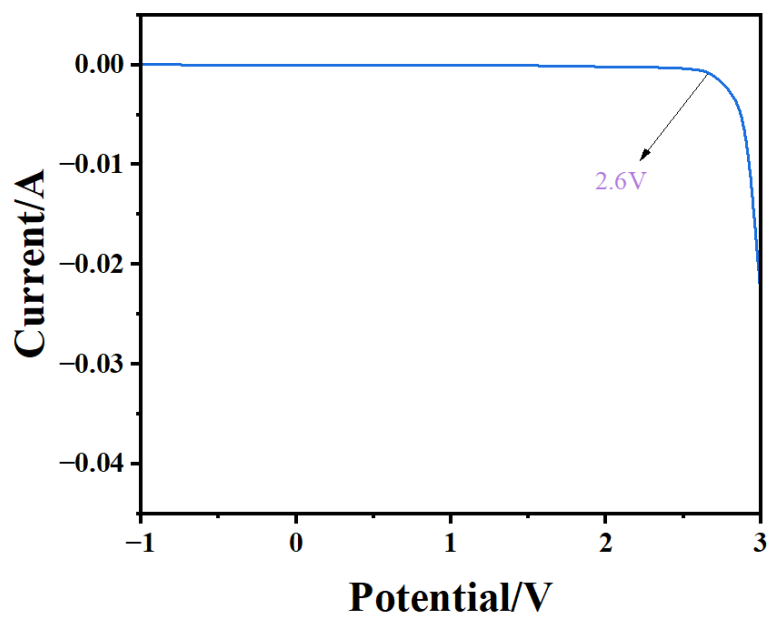

Figure S7 LSV curve of PHILZM.

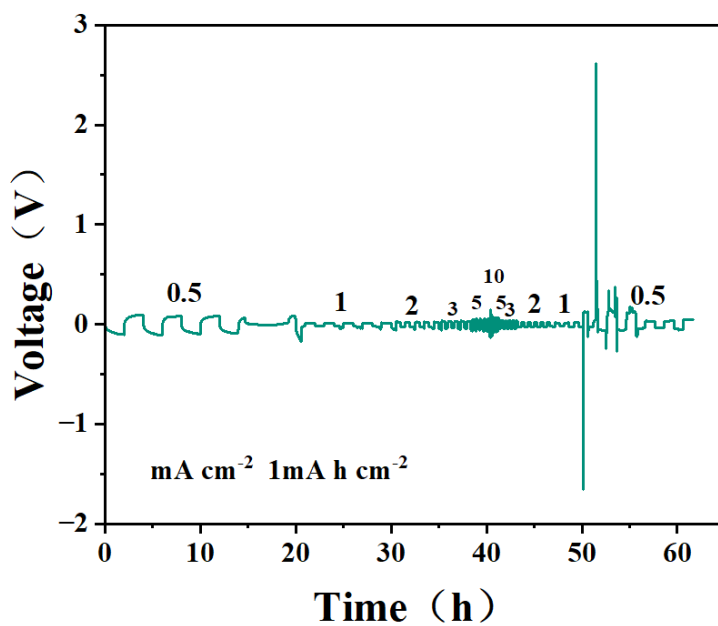

Figure S8 Rate performance of Zn/Zn cells with the PHILZ electrolyte.

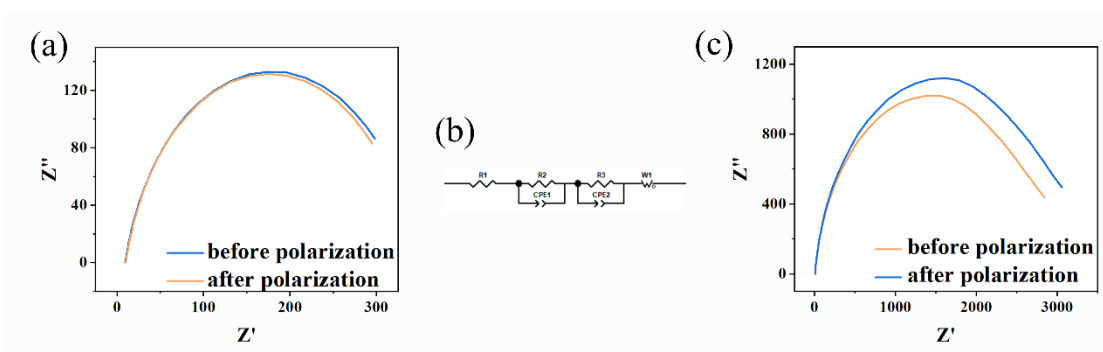

Figure S9 AC impedance plot during CA testing of (a) PHILZ and (c) PHILZM. (b) Equivalent circuit.

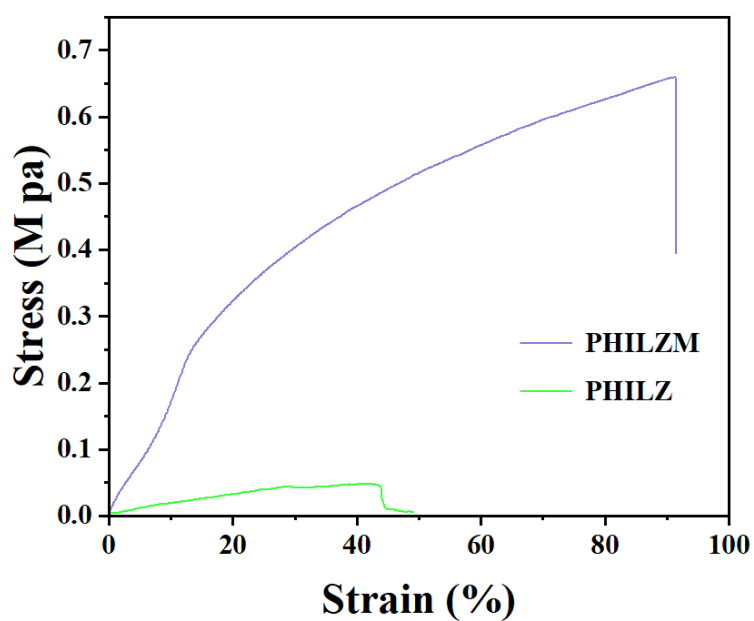

Figure S10 Stress-strain curves for PHILZM and PHILZ

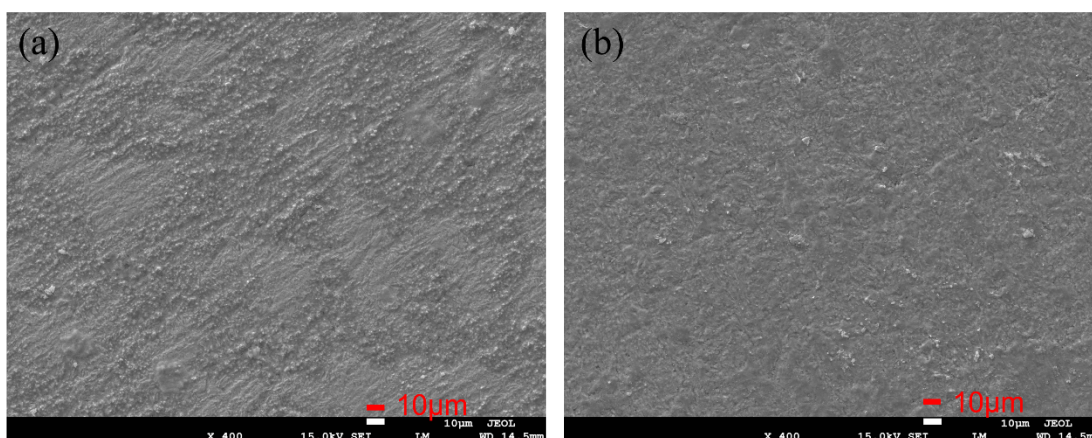

Figure S11 scanning electron microscope images after (a) 5 and (b) 10 plating/stripping cycles

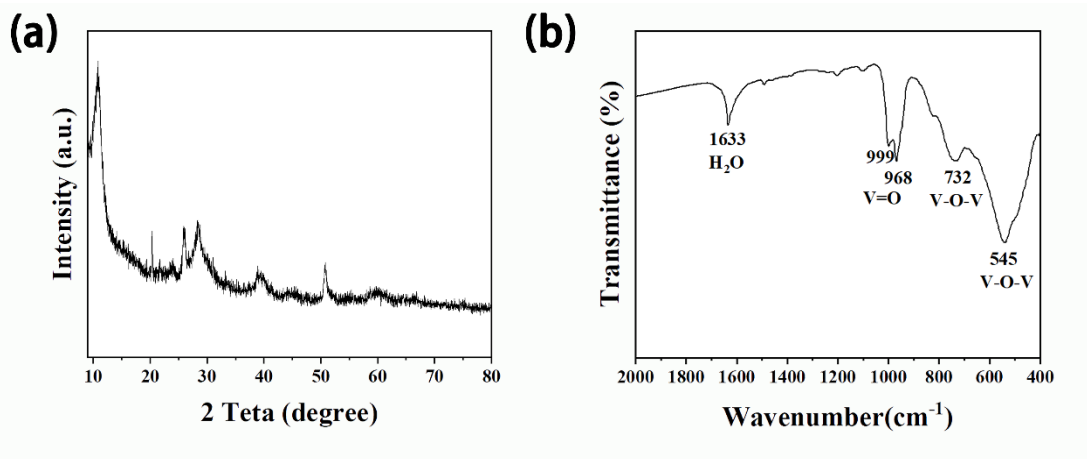

Figure S12 (a) XRD and (b) FTIR spectrum of NVO.

## Supporting Table

Table S1 · The ionic conductivity and cycle life of Zn/ Zn-symmetric batteries with different electrolytes.

| Electrolyte                            | Ionic conductivity<br>(mS/cm) | Density/Capacity<br>(mA cm <sup>-2</sup> /mA h<br>cm <sup>-2</sup> ) | Lifespan(hours) | references     |
|----------------------------------------|-------------------------------|----------------------------------------------------------------------|-----------------|----------------|
| PHILZM                                 | 7.3 (20°C)                    | 1/1<br>5/5                                                           | 3600<br>3000    | This work      |
| PVDF-HFP/nano<br>SiO <sub>2</sub>      | 0.71(25°C)                    | ×                                                                    | ×               | 2 <sup>2</sup> |
| PVDF-HFP/nano<br>HAP                   | 0.74(25°C)                    | 0.2/0.2                                                              | 1200            | 3 <sup>3</sup> |
| PVDF-HFP/<br>butanedinitrile           | 1.35(25°C)                    | ×                                                                    | ×               | 4 <sup>4</sup> |
| PVDF-HFP/Zr-BDC                        | 0.527(25°C)                   | 1/1                                                                  | 2000            | 5 <sup>5</sup> |
| PVDF-HFP/MXene                         | 1.54(25°C)                    | 0.3/0.3                                                              | 800             | 6 <sup>6</sup> |
| PMIA@PAN/PVDF<br>-HFP/TiO <sub>2</sub> | 1.36(25°C)                    | 0.2/0.2                                                              | 1000            | 7 <sup>7</sup> |
| PVDF-HFP/DI                            | 2.4(20°C)                     | 0.2/0.2                                                              | 2000            | 8 <sup>8</sup> |
| PVDF-HFP/Cu                            | 3.59(25°C)                    | ×                                                                    | ×               | 9 <sup>9</sup> |

Table S2 · The zeta potential of ZIF-8.

|                | Sample 1 | Sample 2 | Sample 3 |
|----------------|----------|----------|----------|
| zeta potential | 24.3 mV  | 25.4 mV  | 24.1 mV  |

## References

- (1) Wan, F.; Zhang, L.; Dai, X.; Wang, X.; Niu, Z.; Chen, J. Aqueous Rechargeable Zinc/Sodium Vanadate Batteries with Enhanced Performance from Simultaneous Insertion of Dual Carriers. *Nat Commun* **2018**, *9* (1), 1656. <https://doi.org/10.1038/s41467-018-04060-8>.
- (2) Das, A.; Melepurakkal, A.; Sreeram, P.; Gireesh, K. T.; Balakrishnan, N. T. M.; Jabeen Fatima, M. J.; Pullanchiyodan, A.; Ahn, J.-H.; Shelke, M. V.; Raghavan, P. Exceptional Cyclability of Thermally Stable PVdF-Co-HFP/SiO<sub>2</sub> Nanocomposite Polymer Electrolytes for Sodium Ion Batteries. *Journal of Energy Storage* **2023**, *73*, 109026. <https://doi.org/10.1016/j.est.2023.109026>.
- (3) Lv, Q.; Song, Y.; Wang, B.; Wang, S.; Wu, B.; Jing, Y.; Ren, H.; Yang, S.; Wang, L.; Xiao, L.; Wang, D.; Liu, H.; Dou, S. Bifunctional Flame Retardant Solid-State Electrolyte toward Safe Li Metal Batteries. *Journal of Energy Chemistry* **2023**, *81*, 613–622. <https://doi.org/10.1016/j.jechem.2023.02.040>.
- (4) Huang, R.; Xu, R.; Zhang, J.; Wang, J.; Zhou, T.; Liu, M.; Wang, X. PVDF-HFP-SN-Based Gel Polymer Electrolyte for High-Performance Lithium-Ion Batteries. *Nano Res.* **2023**, *16* (7), 9480–9487. <https://doi.org/10.1007/s12274-023-5707-x>.
- (5) Huang, W.; Wang, S.; Zhang, X.; Kang, Y.; Zhang, H.; Deng, N.; Liang, Y.; Pang, H. Universal



F4-Modified Strategy on Metal–Organic Framework to Chemical Stabilize PVDF-HFP as Quasi-Solid-State Electrolyte. *Advanced Materials* **2023**, *35* (52), 2310147. <https://doi.org/10.1002/adma.202310147>.

(6) Tang, Y.; Xiong, Y.; Wu, L.; Xiong, X.; Me, T.; Wang, X. A Solid-State Lithium Battery with PVDF–HFP-Modified Fireproof Ionogel Polymer Electrolyte. *ACS Appl. Energy Mater.* **2023**, *6* (7), 4016–4026. <https://doi.org/10.1021/acsaem.3c00249>.

(7) Li, H.; Feng, T.; Liang, Y.; Wu, M. Construction of PMIA@PAN/PVDF-HFP/TiO<sub>2</sub> Coaxial Fibrous Separator with Enhanced Mechanical Strength and Electrolyte Affinity for Lithium-Ion Batteries. *Chinese Chemical Letters* **2023**, *34* (12), 108350. <https://doi.org/10.1016/j.cclet.2023.108350>.

(8) Chen, J.; Zhu, G.; Jiang, K.; Xu, H.; Zhao, Y.; Wang, H.; Pang, P.; Bai, Y.; Wang, P.; Wu, H. Facilely Construction of Multistage Channel in PVDF-HFP for High Ionic Conductivity and Prominent Anti-Lithium Dendrites. *Chemical Engineering Journal* **2024**, *479*, 147761. <https://doi.org/10.1016/j.cej.2023.147761>.

(9) Nikodimos, Y.; Su, W.-N.; Shitaw, K. N.; Jiang, S.-K.; Abrha, L. H.; Weret, M. A.; Merso, S. K.; Hagos, T. M.; Huang, C.-J.; Lakshmanan, K.; Huang, W.-H.; Chang, C.-Y.; Lin, J.-M.; Wu, S.-H.; Yang, C.-C.; Hwang, B. J. Multifunctional Electrospun PVDF-HFP Gel Polymer Electrolyte Membrane Suppresses Dendrite Growth in Anode-Free Li Metal Battery. *Energy Storage Materials* **2023**, *61*, 102861. <https://doi.org/10.1016/j.ensm.2023.102861>.
